# Supplementary material for: A hierarchical model for estimating the spatial distribution and abundance of animals detected by continuous-time recorders
Source: PubMed Central journal article supplement (PMC5435310; doi:10.1371/journal.pone.0176966), 2017-05-17
Supplement: pone.0176966.s001.pdf [file pone.0176966.s001.pdf]

# S1 Appendix: Markov chain Monte Carlo (MCMC)

## algorithms<sup>1</sup>

In this supplement we describe the MCMC algorithms that were used to compute the Markov chains needed for estimating summaries of the posterior distribution of each model’s parameters. We use bracket notation (Gelfand and Smith, 1990) to specify probability density functions; thus,  $[x, y]$  denotes the joint density of random variables  $X$  and  $Y$ ,  $[x|y]$  denotes the conditional density of  $X$  given  $Y = y$ , and  $[x]$  denotes the unconditional (marginal) density of  $X$ .

### Model of detection frequencies and detection times

We used a MCMC algorithm to generate a Markov chain whose stationary distribution is equivalent to a posterior with the following unnormalized density function:

$$[\boldsymbol{\theta}, n_0, \mathbf{s}_1, \dots, \mathbf{s}_n | \mathbf{y}_{(1:n)}, \mathbf{t}_{(1:n)}, n] \propto [\boldsymbol{\theta}] [\mathbf{y}_{(1:n)}, \mathbf{t}_{(1:n)}, n, n_0, \mathbf{s}_1, \dots, \mathbf{s}_n | \boldsymbol{\theta}]$$

where  $\boldsymbol{\theta} = (\boldsymbol{\beta}', \boldsymbol{\alpha}', \sigma, \xi)'$  denotes a vector of unknown parameters assumed to have mutually independent prior distributions (that is,  $[\boldsymbol{\theta}] = [\boldsymbol{\beta}][\boldsymbol{\alpha}][\sigma][\xi]$ ). The posterior density function conditions on  $n$ , the number of distinct individuals observed during the sampling period, and on the frequencies and times of detection ( $\mathbf{y}_{(1:n)}$  and  $\mathbf{t}_{(1:n)}$ , respectively) of these individuals.

We developed a MCMC algorithm that combined two sampling algorithms (delayed-rejection, Metropolis-Hastings (Tierney and Mira, 1999; Mira, 2001) and adaptive, Metropolis (Rosenthal, 2011)) to draw random samples from full conditional distributions. This approach was more complex to implement than simple Metropolis-Hastings, but it produced considerably more efficient Markov chains that mixed well and appeared to converge more

---

<sup>1</sup>This draft manuscript is distributed solely for purposes of scientific peer review. Its content is deliberative and predecisional, so it must not be disclosed or released by reviewers. Because the manuscript has not yet been approved for publication by the U.S. Geological Survey (USGS), it does not represent any official USGS finding or policy.

19 quickly. Each of the following full conditional distributions was sampled in one iteration of  
 20 our MCMC algorithm:

21 1. The full conditional for  $n_0$  has a familiar form:  $n_0|\cdot \sim \text{Poisson}(\pi_0 \Lambda(B))$ , where

$$\pi_0 \Lambda(B) = \int_B \lambda(\mathbf{s}) \prod_{k=1}^K \exp[-\Phi(T_k, \mathbf{s}, \mathbf{x}_k)] d\mathbf{s}$$

22 (The integral required to compute  $\pi_0 \Lambda(B)$  cannot be evaluated in closed form. In  
 23 practice this integral is approximated as a Riemann sum by partitioning  $B$  into a  
 24 sufficiently fine grid.) The full conditional for  $n_0$  is the conditional posterior for the  
 25 number of activity centers of animals that were present in region  $B$  but not detected  
 26 during the period of sampling. In our model of the tiger data,  $\Phi(T_k, \mathbf{s}, \mathbf{x}_k)$  can be  
 27 expressed in closed form as follows:

$$\Phi(T_k, \mathbf{s}, \mathbf{x}_k) = (T_{k,n} + T_{k,d} \exp(\xi)) \exp(\boldsymbol{\alpha}' \mathbf{w}_k - \|\mathbf{s} - \mathbf{x}_k\|^2 / (2\sigma^2))$$

28 where  $T_{k,n}$  and  $T_{k,d}$  denote the periods of operation of camera  $k$  during nighttime and  
 29 daytime, respectively and where  $T_k = T_{k,n} + T_{k,d}$ .

2. The full conditional for  $\mathbf{s}_i$  has unnormalized density

$$[\mathbf{s}_i|\cdot] = \lambda(\mathbf{s}_i) \prod_{k=1}^K \exp(-\Phi(T_k, \mathbf{s}_i, \mathbf{x}_k)) \prod_{j=1}^{y_{ik}} \phi(t_{ikj}, \mathbf{s}_i, \mathbf{x}_k)$$

30 where  $\phi(t_{ikj}, \mathbf{s}_i, \mathbf{x}_k) = \exp[\boldsymbol{\alpha}' \mathbf{w}_k + \xi z(t_{ikj}) - \|\mathbf{s}_i - \mathbf{x}_k\|^2 / (2\sigma^2)]$ . To sample this full  
 31 conditional, we used a delayed-rejection Metropolis-Hastings algorithm treating  $[\mathbf{s}_i|\cdot]$   
 32 as the target density. In particular, first we used a bivariate normal distribution as a  
 33 proposal and selected its parameters to approximate the target distribution. Specif-  
 34 ically, let  $f(\mathbf{s}_i) = \log([\mathbf{s}_i|\cdot])$ . We assigned the mean of the proposal distribution to  
 35 equal  $\hat{\mathbf{s}}_i$ , the value of  $\mathbf{s}_i$  that maximized  $f(\mathbf{s}_i)$ . This maximization was done numer-

36 ically using an analytical gradient  $\mathbf{g}(\mathbf{s}_i)$  and hessian  $\mathbf{H}(\mathbf{s}_i)$ . The covariance matrix of  
 37 the proposal distribution was computed by inverting the negative of the hessian matrix  
 38  $[-\mathbf{H}(\hat{\mathbf{s}}_i)]^{-1}$ . If the candidate of this proposal distribution was rejected, we computed a  
 39 second candidate using a bivariate normal distribution with mean equal to the current  
 40 value of  $\mathbf{s}_i$  and with a diagonal covariance matrix  $\sigma_{s_i}^2 \mathbf{I}$  (where  $\mathbf{I}$  is an identity matrix  
 41 and  $\sigma_{s_i}$  is a known scale parameter). In other words, we used a random-walk Metropolis  
 42 algorithm to generate the second candidate. The acceptance probability of the second  
 43 candidate was computed to ensure that the Markov chain remained reversible relative  
 44 to its stationary distribution (Mira, 2001). In cases where the first proposal’s mean or  
 45 covariance matrix could not be computed due to failed optimization, we simply applied  
 46 the random-walk Metropolis algorithm with the bivariate normal proposal described  
 47 earlier. The scale parameter  $\sigma_{s_i}$  of the random-walk proposal distribution was tuned  
 48 adaptively – that is, by incrementing or decrementing the proposal distribution’s vari-  
 49 ance depending on whether or not the acceptance rate in each batch of 50 iterations of  
 50 the MCMC algorithm exceeded a target rate of 0.234 (Rosenthal, 2011, Sections 4.3.3  
 51 and 4.3.4). We reduced the absolute value of these adjustments in proportion to the  
 52 inverse square root of the number of batches to ensure that the diminishing-adaptation  
 53 condition required for convergence (in distribution) of the Markov chain was satisfied  
 54 (Roberts and Rosenthal, 2007).

3. The full conditional for  $\boldsymbol{\beta}$  has unnormalized density

$$[\boldsymbol{\beta}|\cdot] = [\boldsymbol{\beta}] \exp(-\Lambda(B)) (\pi_0 \Lambda(B))^{n_0} \prod_{i=1}^n \lambda(\mathbf{s}_i)$$

55 where  $[\boldsymbol{\beta}]$  denotes the density function of a multivariate normal prior with mean  $\mathbf{0}$   
 56 and diagonal covariance matrix  $\sigma_\beta \mathbf{I}$ . The scale parameter  $\sigma_\beta$  was assigned a value of  
 57 10 to specify an arbitrarily high level of prior uncertainty in the magnitude of  $\boldsymbol{\beta}$ . To  
 58 sample the full conditional of  $\boldsymbol{\beta}$ , we used the approach described earlier (see item #2)

59 where  $[\boldsymbol{\beta}|\cdot]$  is treated as the target density for samplers based on delayed-rejection,  
 60 Metropolis-Hastings and adaptive Metropolis algorithms.

4. The full conditional for the parameters  $\boldsymbol{\alpha}$ ,  $\xi$ , and  $\sigma$  has unnormalized density

$$[\boldsymbol{\alpha}, \xi, \sigma|\cdot] = [\boldsymbol{\alpha}][\xi][\sigma] (\pi_0 \Lambda(B))^{n_0} \prod_{i=1}^n \prod_{k=1}^K \exp[-\Phi(T_k, \mathbf{s}_i, \mathbf{x}_k)] \prod_{j=1}^{y_{ik}} \phi(t_{ikj}, \mathbf{s}_i, \mathbf{x}_k)$$

61 where  $[\boldsymbol{\alpha}]$  denotes the density function of a multivariate normal prior with mean  $\mathbf{0}$   
 62 and diagonal covariance matrix  $\sigma_\alpha \mathbf{I}$ . The scale parameter  $\sigma_\alpha$  was assigned a value  
 63 of 10 to specify an arbitrarily high level of prior uncertainty in the magnitude of  
 64  $\boldsymbol{\alpha}$ . Similarly,  $[\xi]$  denotes the density function of a normal prior with mean zero and  
 65 relatively high variance ( $10^2$ ). A Half- $t$  distribution with  $\nu = 2$  degrees of freedom and  
 66 scale parameter  $s = 10$  was used to specify a weakly-informative prior for  $\sigma$  (Gelman,  
 67 2006);  $[\sigma]$  denotes the density function of this prior. To sample the full conditional  
 68 of  $\boldsymbol{\alpha}$ ,  $\xi$ , and  $\sigma$ , we used the approach described earlier (see item #2) where  $[\boldsymbol{\alpha}, \xi, \sigma|\cdot]$   
 69 is treated as the target density for samplers based on delayed-rejection, Metropolis-  
 70 Hastings and adaptive Metropolis algorithms.

## 71 **Restricted model of detection frequencies**

We used a MCMC algorithm to generate a Markov chain whose stationary distribution  
 is equivalent to a posterior with the following unnormalized density function:

$$[\boldsymbol{\theta}, n_0, \mathbf{s}_1, \dots, \mathbf{s}_n | \mathbf{y}_{(1:n)}, n] \propto [\boldsymbol{\theta}] [\mathbf{y}_{(1:n)}, n, n_0, \mathbf{s}_1, \dots, \mathbf{s}_n | \boldsymbol{\theta}]$$

72 where  $\boldsymbol{\theta} = (\boldsymbol{\beta}', \boldsymbol{\alpha}', \sigma)'$  denotes a vector of unknown parameters assumed to have mutually  
 73 independent prior distributions (that is,  $[\boldsymbol{\theta}] = [\boldsymbol{\beta}][\boldsymbol{\alpha}][\sigma]$ ). The posterior density function  
 74 conditions on  $n$ , the number of distinct individuals observed during the sampling period,  
 75 and on the frequencies of detection ( $\mathbf{y}_{(1:n)}$ ) of these individuals.

76 As with the model of detection frequencies and detection times, we developed a MCMC  
77 algorithm that combined two sampling algorithms (delayed-rejection, Metropolis-Hastings  
78 (Tierney and Mira, 1999; Mira, 2001) and adaptive, Metropolis (Rosenthal, 2011)) to draw  
79 random samples from full conditional distributions. Except for parameter  $n_0$ , we sampled  
80 each full conditional using the approach described earlier (see item #2 above) where the full  
81 conditional density is treated as the target density for samplers based on delayed-rejection,  
82 Metropolis-Hastings and adaptive Metropolis algorithms. Therefore, for sake of brevity,  
83 below we simply describe the full conditional distributions sampled in one iteration of our  
84 MCMC algorithm:

85 1. The full conditional for  $n_0$  has a familiar form:  $n_0|\cdot \sim \text{Poisson}(\pi_0 \Lambda(B))$ , where

$$\pi_0 \Lambda(B) = \int_B \lambda(\mathbf{s}) \prod_{k=1}^K \exp[-\Phi(T_k, \mathbf{s}, \mathbf{x}_k)] d\mathbf{s}$$

86 (The integral required to compute  $\pi_0 \Lambda(B)$  cannot be evaluated in closed form. In  
87 practice this integral is approximated as a Riemann sum by partitioning  $B$  into a  
88 sufficiently fine grid.) The full conditional for  $n_0$  is the conditional posterior for the  
89 number of activity centers of animals that were present in region  $B$  but not detected  
90 during the period of sampling. In this restricted model,  $\Phi(T_k, \mathbf{s}, \mathbf{x}_k)$  can be expressed  
91 in closed form as follows:

$$\begin{aligned} \Phi(T_k, \mathbf{s}, \mathbf{x}_k) &= T_k \exp(\boldsymbol{\alpha}' \mathbf{w}_k - \|\mathbf{s} - \mathbf{x}_k\|^2 / (2\sigma^2)) \\ &= T_k \phi(\mathbf{s}, \mathbf{x}_k) \end{aligned}$$

2. The full conditional for  $\mathbf{s}_i$  has unnormalized density

$$[\mathbf{s}_i|\cdot] = \lambda(\mathbf{s}_i) \prod_{k=1}^K \exp[-T_k \phi(\mathbf{s}_i, \mathbf{x}_k)] \phi(\mathbf{s}_i, \mathbf{x}_k)^{y_{ik}}$$

92 where  $\phi(\mathbf{s}_i, \mathbf{x}_k) = \exp[\boldsymbol{\alpha}'\mathbf{w}_k - \|\mathbf{s}_i - \mathbf{x}_k\|^2/(2\sigma^2)]$ .

3. The full conditional for  $\boldsymbol{\beta}$  has unnormalized density

$$[\boldsymbol{\beta}|\cdot] = [\boldsymbol{\beta}] \exp(-\Lambda(B)) (\pi_0 \Lambda(B))^{n_0} \prod_{i=1}^n \lambda(\mathbf{s}_i)$$

93 where  $[\boldsymbol{\beta}]$  denotes the density function of a multivariate normal prior with mean  $\mathbf{0}$  and  
 94 diagonal covariance matrix  $\sigma_\beta \mathbf{I}$ . The scale parameter  $\sigma_\beta$  was assigned a value of 10 to  
 95 specify an arbitrarily high level of prior uncertainty in the magnitude of  $\boldsymbol{\beta}$ .

4. The full conditional for the parameters  $\boldsymbol{\alpha}$  and  $\sigma$  has unnormalized density

$$[\boldsymbol{\alpha}, \sigma|\cdot] = [\boldsymbol{\alpha}][\sigma] (\pi_0 \Lambda(B))^{n_0} \prod_{i=1}^n \prod_{k=1}^K \exp[-T_k \phi(\mathbf{s}_i, \mathbf{x}_k)] \phi(\mathbf{s}_i, \mathbf{x}_k)^{y_{ik}}$$

96 where  $[\boldsymbol{\alpha}]$  denotes the density function of a multivariate normal prior with mean  $\mathbf{0}$   
 97 and diagonal covariance matrix  $\sigma_\alpha \mathbf{I}$ . The scale parameter  $\sigma_\alpha$  was assigned a value of  
 98 10 to specify an arbitrarily high level of prior uncertainty in the magnitude of  $\boldsymbol{\alpha}$ . A  
 99 Half- $t$  distribution with  $\nu = 2$  degrees of freedom and scale parameter  $s = 10$  was used  
 100 to specify a weakly-informative prior for  $\sigma$  (Gelman, 2006);  $[\sigma]$  denotes the density  
 101 function of this prior.

## 102 Posterior inference and estimation of Monte Carlo error

103 We used  $M = 2000$  iterations of the MCMC algorithm to estimate summaries (means,  
 104 standard deviations, quantiles) of the posterior distribution and other ecologically relevant  
 105 functionals of the Markov chain. The estimates were computed using ergodic averages,  
 106 which are simulation consistent (that is, the averages converge to posterior expectations as  
 107 the number of iterations increases) according to the strong law of large numbers for Markov  
 108 chains (Flegal and Jones, 2011). (The first 500 elements of the Markov chain were discarded  
 109 to exclude initial transients in the Markov chain.) Monte Carlo standard errors of the

110 estimates were computed using the subsampling bootstrap method Flegal and Jones (2010,  
111 2011) with overlapping batch means of size  $\lfloor \sqrt{M} \rfloor$ .

## 112 References

- 113 Flegal, J. M. and Jones, G. L. (2010). Batch means and spectral variance estimators in  
114 Markov chain Monte Carlo. *Annals of Statistics*, 38:1034–1070.
- 115 Flegal, J. M. and Jones, G. L. (2011). Implementing MCMC: estimating with confidence.  
116 In Brooks, S., Gelman, A., Jones, G. L., and Meng, X. L., editors, *Handbook of Markov*  
117 *chain Monte Carlo*, pages 175–197. Chapman & Hall / CRC, Boca Raton, Florida.
- 118 Gelfand, A. E. and Smith, A. F. M. (1990). Sampling-based approaches to calculating  
119 marginal densities. *Journal of the American Statistical Association*, 85:398–409.
- 120 Gelman, A. (2006). Prior distributions for variance parameters in hierarchical models (Com-  
121 ment on article by Browne and Draper). *Bayesian Analysis*, 1:515–534.
- 122 Mira, A. (2001). On Metropolis-Hastings algorithms with delayed rejection. *Metron*, 59:231–  
123 241.
- 124 R Core Team (2016). *R: A Language and Environment for Statistical Computing*. R Foun-  
125 dation for Statistical Computing, Vienna, Austria.
- 126 Roberts, G. O. and Rosenthal, J. S. (2007). Coupling and ergodicity of adaptive Markov  
127 chain Monte Carlo algorithms. *Journal of Applied Probability*, 44:458–475.
- 128 Rosenthal, J. S. (2011). Optimal proposal distributions and adaptive MCMC. In Brooks,  
129 S., Gelman, A., Jones, G. L., and Meng, X. L., editors, *Handbook of Markov chain Monte*  
130 *Carlo*, pages 93–111. Chapman & Hall / CRC, Boca Raton, Florida.
- 131 Tierney, L. and Mira, A. (1999). Some adaptive Monte Carlo methods for Bayesian inference.  
132 *Statistics in Medicine*, 18:2507–2515.

## 133 **Disclaimers**

134       The computing program (R Core Team, 2016) needed to implement our MCMC algorithm  
135 is available in S4 Appendix.<sup>2</sup> Any use of trade, firm, or product names is for descriptive  
136 purposes only and does not imply endorsement by the U.S. Government.

---

<sup>2</sup>This software has been approved for release by the U.S. Geological Survey (USGS). Although the software has been subjected to rigorous review, the USGS reserves the right to update the software as needed pursuant to further analysis and review. No warranty, expressed or implied, is made by the USGS or the U.S. Government as to the functionality of the software and related material nor shall the fact of release constitute any such warranty. Furthermore, the software is released on condition that neither the USGS nor the U.S. Government shall be held liable for any damages resulting from its authorized or unauthorized use.
